# Supplementary material for: Fomitopsis officinalis: Spatial (Pileus and Hymenophore) Metabolomic Variations Affect Functional Components and Biological Activities
Source: MDPI journal article supplement (doi:10.3390/antibiotics12040766), 2023-04-16
Supplement: s1 [file s1]

# ***Fomitopsis officinalis*: spatial (pileus and hymenophore) metabolomic variations affect functional components and biological activities**

Giancarlo Angeles Flores <sup>1,†</sup>, Gaia Cusumano <sup>1,†</sup>, Federica Ianni <sup>2</sup>, Francesca Blasi <sup>2</sup>, Paola Angelini <sup>1</sup>, Lina Cossignani <sup>2,3\*</sup>, Roberto Maria Pellegrino <sup>1</sup>, Carla Emiliani <sup>1</sup>, Roberto Venanzoni <sup>1</sup>, Gokhan Zengin <sup>4</sup>, Alessandra Acquaviva <sup>5</sup>, Simonetta Cristina Di Simone <sup>5</sup>, Maria Loreta Libero <sup>5</sup>, Nilofar <sup>5</sup>, Giustino Orlando <sup>5</sup>, Luigi Menghini <sup>5\*</sup>, Claudio Ferrante <sup>5</sup>

<sup>1</sup> Department of Chemistry, Biology and Biotechnology, University of Perugia, 06122 Perugia, Italy; giancarlo.angelesflores@unich.it (G.A.F.); gaia.cusumano@studenti.unipg.it (G.C.); paola.angelini@unipg.it (P.A.); roberto.pellegrino@unipg.it (R.M.P.); carla.emiliani@unipg.it (C.E.); roberto.venanzoni@unipg.it (R.V.)

<sup>2</sup> Department of Pharmaceutical Sciences, University of Perugia, 06126 Perugia, Italy; federica.ianni@unipg.it (F.I.); francesca.blasi@unipg.it (F.B.); lina.cossignani@unipg.it (L.C.)

<sup>3</sup> Center for Perinatal and Reproductive Medicine, Santa Maria della Misericordia University Hospital, University of Perugia, 06132 Perugia, Italy

<sup>4</sup> Physiology and Biochemistry Research Laboratory, Department of Biology, Science Faculty, Selcuk University, 42130 Konya, Turkey; gokhanzengin@selcuk.edu.tr

<sup>5</sup> Botanic Garden “Giardino dei Semplici”, Department of Pharmacy, “Gabriele d’Annunzio” University, Via dei Vestini 31, 66100 Chieti, Italy; alessandra.acquaviva@unich.it (A.A.); simonetta.disimone@unich.it (S.C.D.S.); maria.libero@unich.it (M.L.L.); nilofar.nilofar@unich.it (N.N.); giustino.orlando@unich.it (G.O.); luigi.menghini@unich.it (L.M.); claudio.ferrante@unich.it (C.F.)

\* Correspondence: lina.cossignani@unipg.it (L.C.); luigi.menghini@unich.it (L.M.)

† These authors contributed equally to this work

**Table S1.** Gradient elution condition of HPLC–DAD–MS analyses.

| TIME (min) | COMPOSITION A %<br>(Water + Formic acid 0.1%) | COMPOSITION B %<br>(Methanol + Formic acid 0.1%) | FLOW (mL/min) |
|------------|-----------------------------------------------|--------------------------------------------------|---------------|
| 1          | 97                                            | 3                                                | 0.6           |
| 5          | 77                                            | 23                                               | 0.6           |
| 12         | 73                                            | 27                                               | 0.6           |
| 18         | 57                                            | 43                                               | 0.6           |
| 25         | 52                                            | 48                                               | 0.6           |
| 32         | 50                                            | 50                                               | 0.6           |
| 34         | 50                                            | 50                                               | 0.6           |
| 37         | 35                                            | 65                                               | 0.6           |
| 40         | 5                                             | 95                                               | 0.6           |
| 47         | 10                                            | 90                                               | 0.6           |
| 48         | 10                                            | 90                                               | 0.6           |

**Table S2.** Content in specialized metabolites ( $\mu\text{g/mL}$ ) of the tested *Fomitopsis officinalis* extracts. All identified phytochemicals have been identified through comparison with pure standards. Quantitative determination of the compounds was performed via DAD detector at 232–372 nm wavelength; nq: not quantified; nd: not detected.

|    | Components              | Chemical Class        | L1-L3<br>hymenium<br>( $\mu\text{g/mg}$ ) | L4-L6<br>apical part<br>( $\mu\text{g/mg}$ ) | L7-L8<br>median part<br>( $\mu\text{g/mg}$ ) | Retention Time<br>(Min) | Wavelengths |
|----|-------------------------|-----------------------|-------------------------------------------|----------------------------------------------|----------------------------------------------|-------------------------|-------------|
| 1  | Gallic acid             | Benzoic acids         | 0.241 $\pm$ 0.005                         | 0.004 $\pm$ 0.001                            | 0.002 $\pm$ 0.001                            | 8.97                    | 271         |
| 2  | Caftaric acid           | Hydroxycinnamic acids | 0.298 $\pm$ 0.013                         | 0.035 $\pm$ 0.004                            | 0.047 $\pm$ 0.002                            | 12.92                   | 310         |
| 3  | Catechin                | Flavanols             | 0.133 $\pm$ 0.008                         | 0.306 $\pm$ 0.014                            | 0.028 $\pm$ 0.002                            | 15.13                   | 278         |
| 4  | Gentisic acid           | Benzoic acids         | 0.049 $\pm$ 0.002                         | 0.014 $\pm$ 0.001                            | 0.025 $\pm$ 0.001                            | 15.65                   | 325         |
| 5  | 4-Hydroxybenzoic acid   | Benzoic acids         | nd                                        | 0.011 $\pm$ 0.001                            | 0.016 $\pm$ 0.001                            | 16.15                   | 256         |
| 6  | Loganic acid            | Iridoids              | nd                                        | nq                                           | 0.007 $\pm$ 0.001                            | 16.94                   | 232         |
| 7  | Chlorogenic acid        | Hydroxycinnamic acids | 0.039 $\pm$ 0.004                         | 0.004 $\pm$ 0.001                            | nd                                           | 17.41                   | 325         |
| 8  | Vanillic acid           | Flavonol glycosides   | 0.028 $\pm$ 0.001                         | 0.010 $\pm$ 0.001                            | 0.012 $\pm$ 0.001                            | 18.77                   | 257         |
| 9  | Caffeic acid            | Hydroxycinnamic acids | 0.008 $\pm$ 0.001                         | nd                                           | nd                                           | 19.68                   | 325         |
| 10 | Epicatechin             | Flavanols             | nd                                        | 0.037 $\pm$ 0.002                            | 0.045 $\pm$ 0.003                            | 19.95                   | 278         |
| 11 | Syringic acid           | Benzoic acids         | nd                                        | 0.016 $\pm$ 0.001                            | 0.018 $\pm$ 0.001                            | 20.46                   | 274         |
| 12 | Syringaldehyde          | Benzoic aldehydes     | 0.252 $\pm$ 0.010                         | 0.086 $\pm$ 0.09                             | 0.059 $\pm$ 0.014                            | 22.02                   | 310         |
| 13 | <i>p</i> -Coumaric acid | Hydroxycinnamic acids | 0.081 $\pm$ 0.001                         | 0.340 $\pm$ 0.014                            | 0.022 $\pm$ 0.002                            | 23.24                   | 310         |
| 14 | <i>t</i> -Ferulic acid  | Hydroxycinnamic acids | nq                                        | nq                                           | nq                                           | 24.41                   | 315         |
| 15 | Benzoic acid            | Benzoic acids         | 0.052 $\pm$ 0.003                         | 0.016 $\pm$ 0.005                            | 0.028 $\pm$ 0.011                            | 26.71                   | 275         |
| 16 | Hyperoside              | Flavonol glycosides   | 0.061 $\pm$ 0.003                         | 0.028 $\pm$ 0.003                            | 0.006 $\pm$ 0.001                            | 27.80                   | 254         |
| 17 | Rutin                   | Flavonol glycosides   | nd                                        | 0.008 $\pm$ 0.001                            | 0.008 $\pm$ 0.001                            | 28.00                   | 254         |
| 18 | Isoquercetin            | Flavonol glycosides   | nq                                        | nq                                           | nq                                           | 28.17                   | 340         |
| 19 | Resveratrol             | Stilbene              | 0.039 $\pm$ 0.005                         | nd                                           | 0.041 $\pm$ 0.007                            | 28.50                   | 310         |
| 20 | Rosmarinic acid         | Hydroxycinnamic acids | 0.101 $\pm$ 0.018                         | nd                                           | nd                                           | 29.48                   | 325         |
| 21 | <i>t</i> -Cinnamic acid | Phenylpropanoids      | 0.028 $\pm$ 0.002                         | nd                                           | 0.017 $\pm$ 0.001                            | 34.97                   | 279         |
| 22 | Quercetin               | Flavonols             | 0.169 $\pm$ 0.015                         | 3.307 $\pm$ 0.251                            | 0.303 $\pm$ 0.043                            | 37.41                   | 372         |
| 23 | Naringenin              | Flavanones            | 0.364 $\pm$ 0.010                         | nd                                           | nd                                           | 38.11                   | 280         |
| 24 | Hesperitin              | Flavanones            | 1.880 $\pm$ 0.041                         | 0.035 $\pm$ 0.007                            | 0.050 $\pm$ 0.012                            | 40.31                   | 280         |
| 25 | Kaempferol              | Flavanols             | 0.004 $\pm$ 0.001                         | 0.044 $\pm$ 0.003                            | 0.082 $\pm$ 0.016                            | 42.43                   | 330         |
| 26 | Carvacrol               | Phenolic monoterpenes | 0.015 $\pm$ 0.003                         | 0.036 $\pm$ 0.002                            | 0.086 $\pm$ 0.013                            | 45.08                   | 275         |
| 27 | Thymol                  | Phenolic monoterpenes | 0.248 $\pm$ 0.033                         | 0.685 $\pm$ 0.043                            | 1.682 $\pm$ 0.058                            | 45.21                   | 275         |
| 28 | Flavone                 | Flavones              | 0.017 $\pm$ 0.005                         | 0.537 $\pm$ 0.030                            | 0.509 $\pm$ 0.017                            | 46.07                   | 340         |
| 29 | 3-Hydroxyflavone        | Flavones              | 0.081 $\pm$ 0.007                         | 0.620 $\pm$ 0.030                            | 0.696 $\pm$ 0.012                            | 46.33                   | 340         |

**Table S3.** Regression equation, linearity, range of concentration of standards (gallic acid for TPC, Trolox for ABTS, DPPH, and FRAP) used for the spectrophotometric assays.

| Assay | Calibration curve       | R <sup>2</sup> | Standard    | Concentration     |
|-------|-------------------------|----------------|-------------|-------------------|
| TPC   | $y = 11.98x - 0.0229$   | 0.995          | Gallic acid | 0.0065-0.1 mg/mL  |
| ABTS  | $y = -1.6803x + 0.6872$ | 0.999          | Trolox      | 0.02-0.3 mg/mL    |
| DPPH  | $y = -1.6006x + 0.6393$ | 0.999          | Trolox      | 0.001-0.250 mg/mL |
| FRAP  | $y = 9.5883x - 0.0145$  | 0.999          | Trolox      | 0.0125-0.1 mg/mL  |

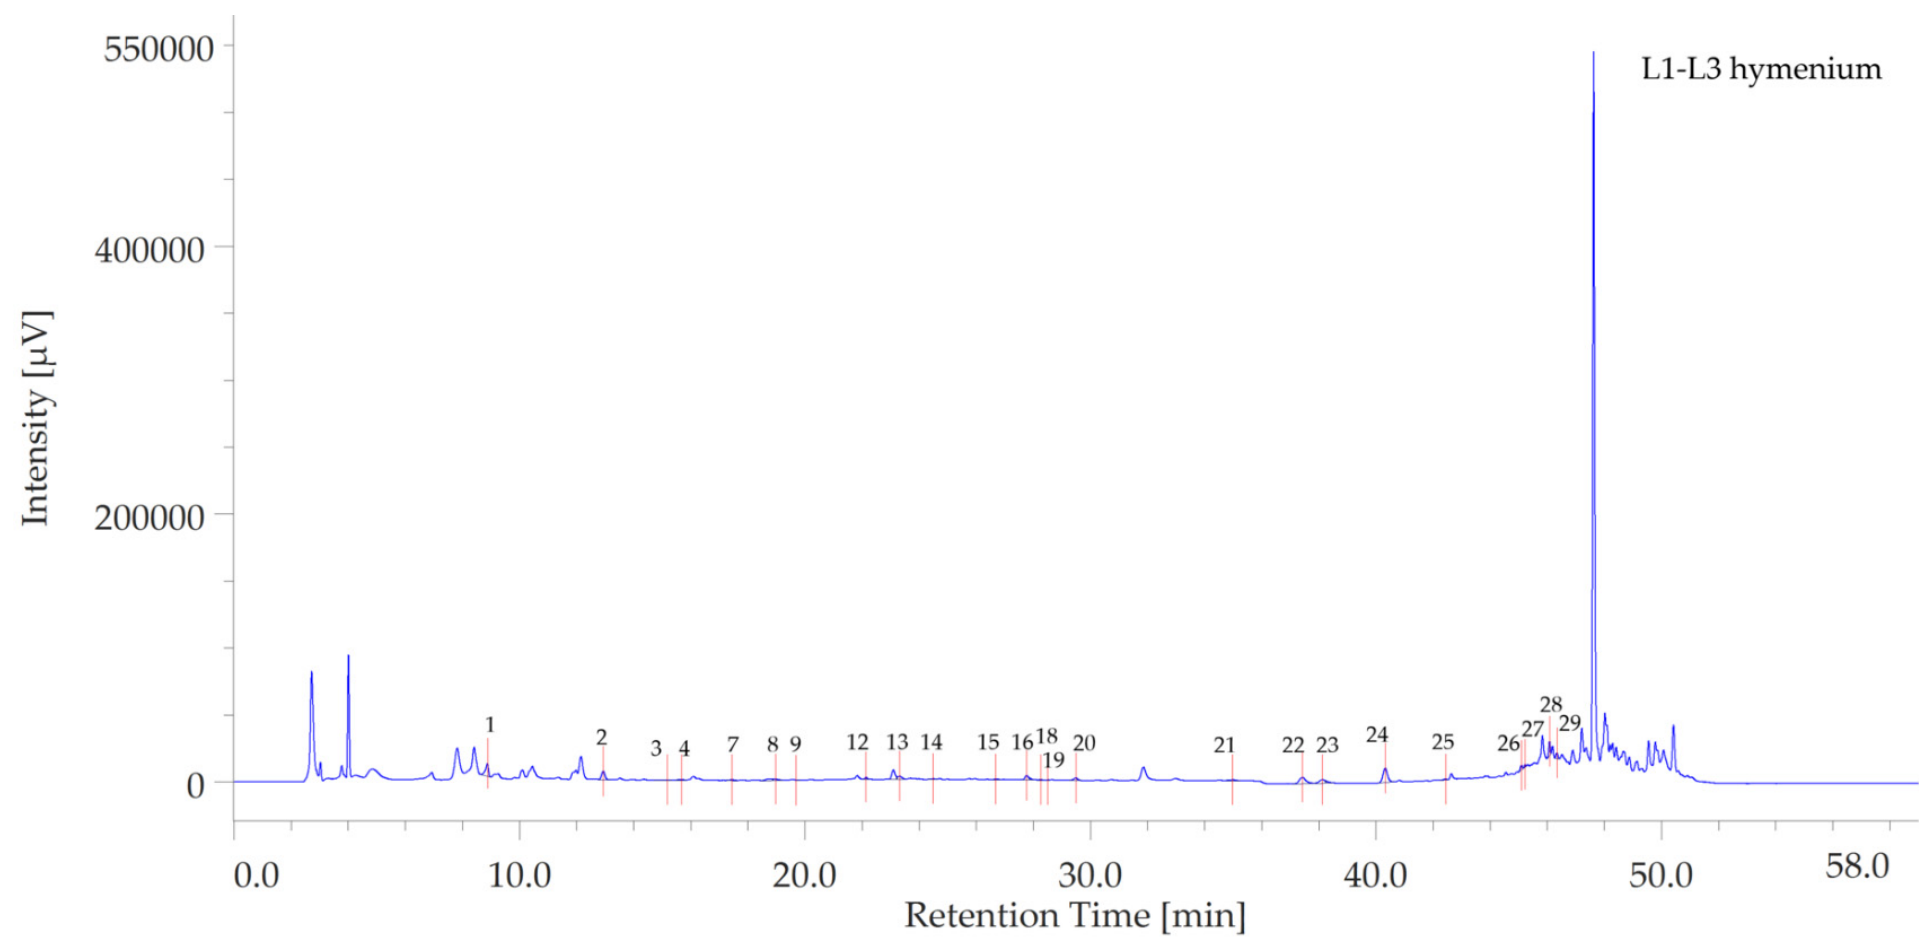

**Figure S1.** Chromatogram of hydroalcoholic extracts from the hymenium of *Fomitopsis officinalis*.

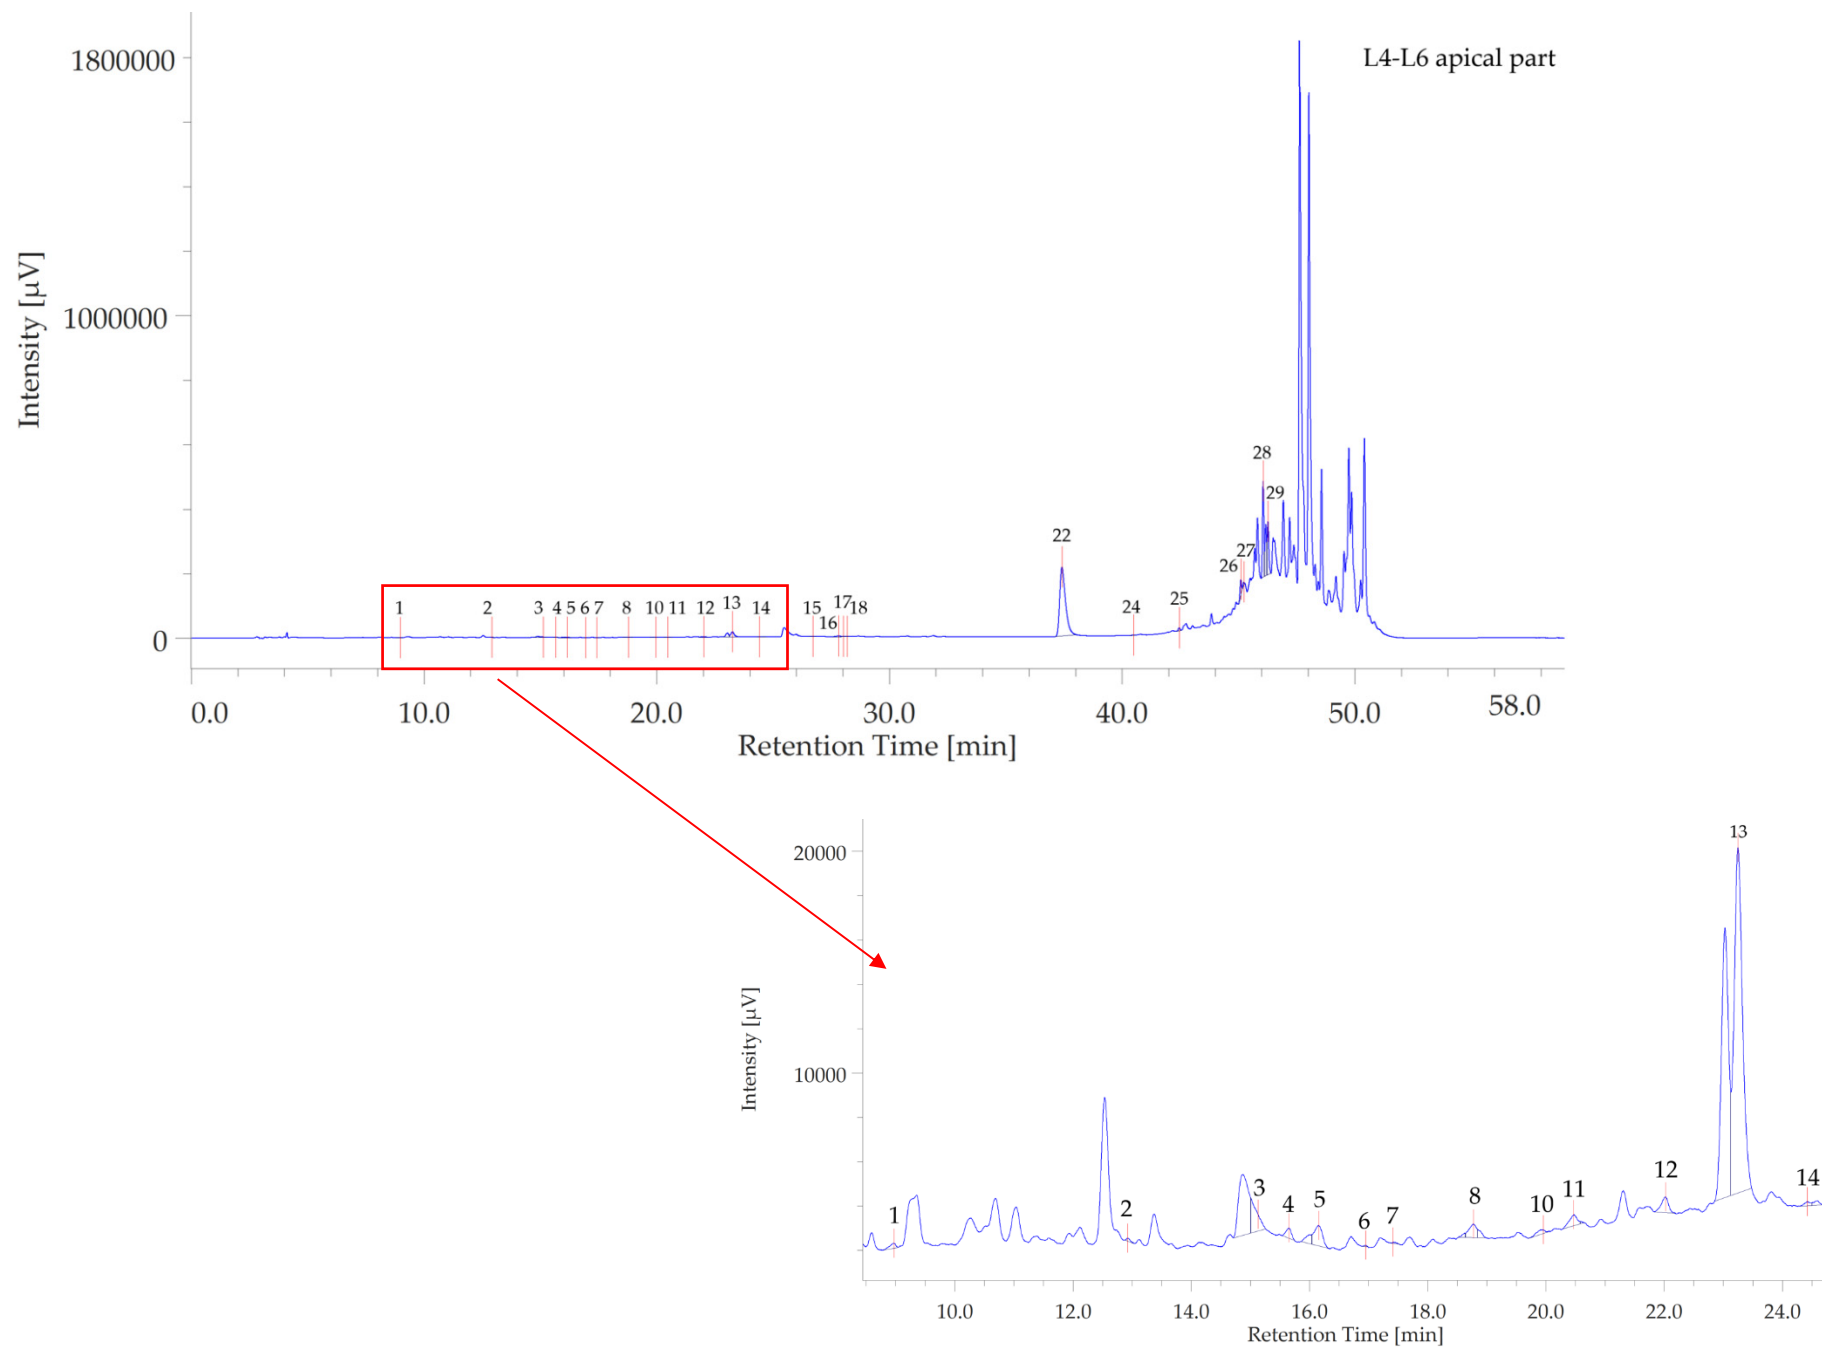

**Figure S2.** Chromatograms of hydroalcoholic extracts from the apical part of *Fomitopsis officinalis*.

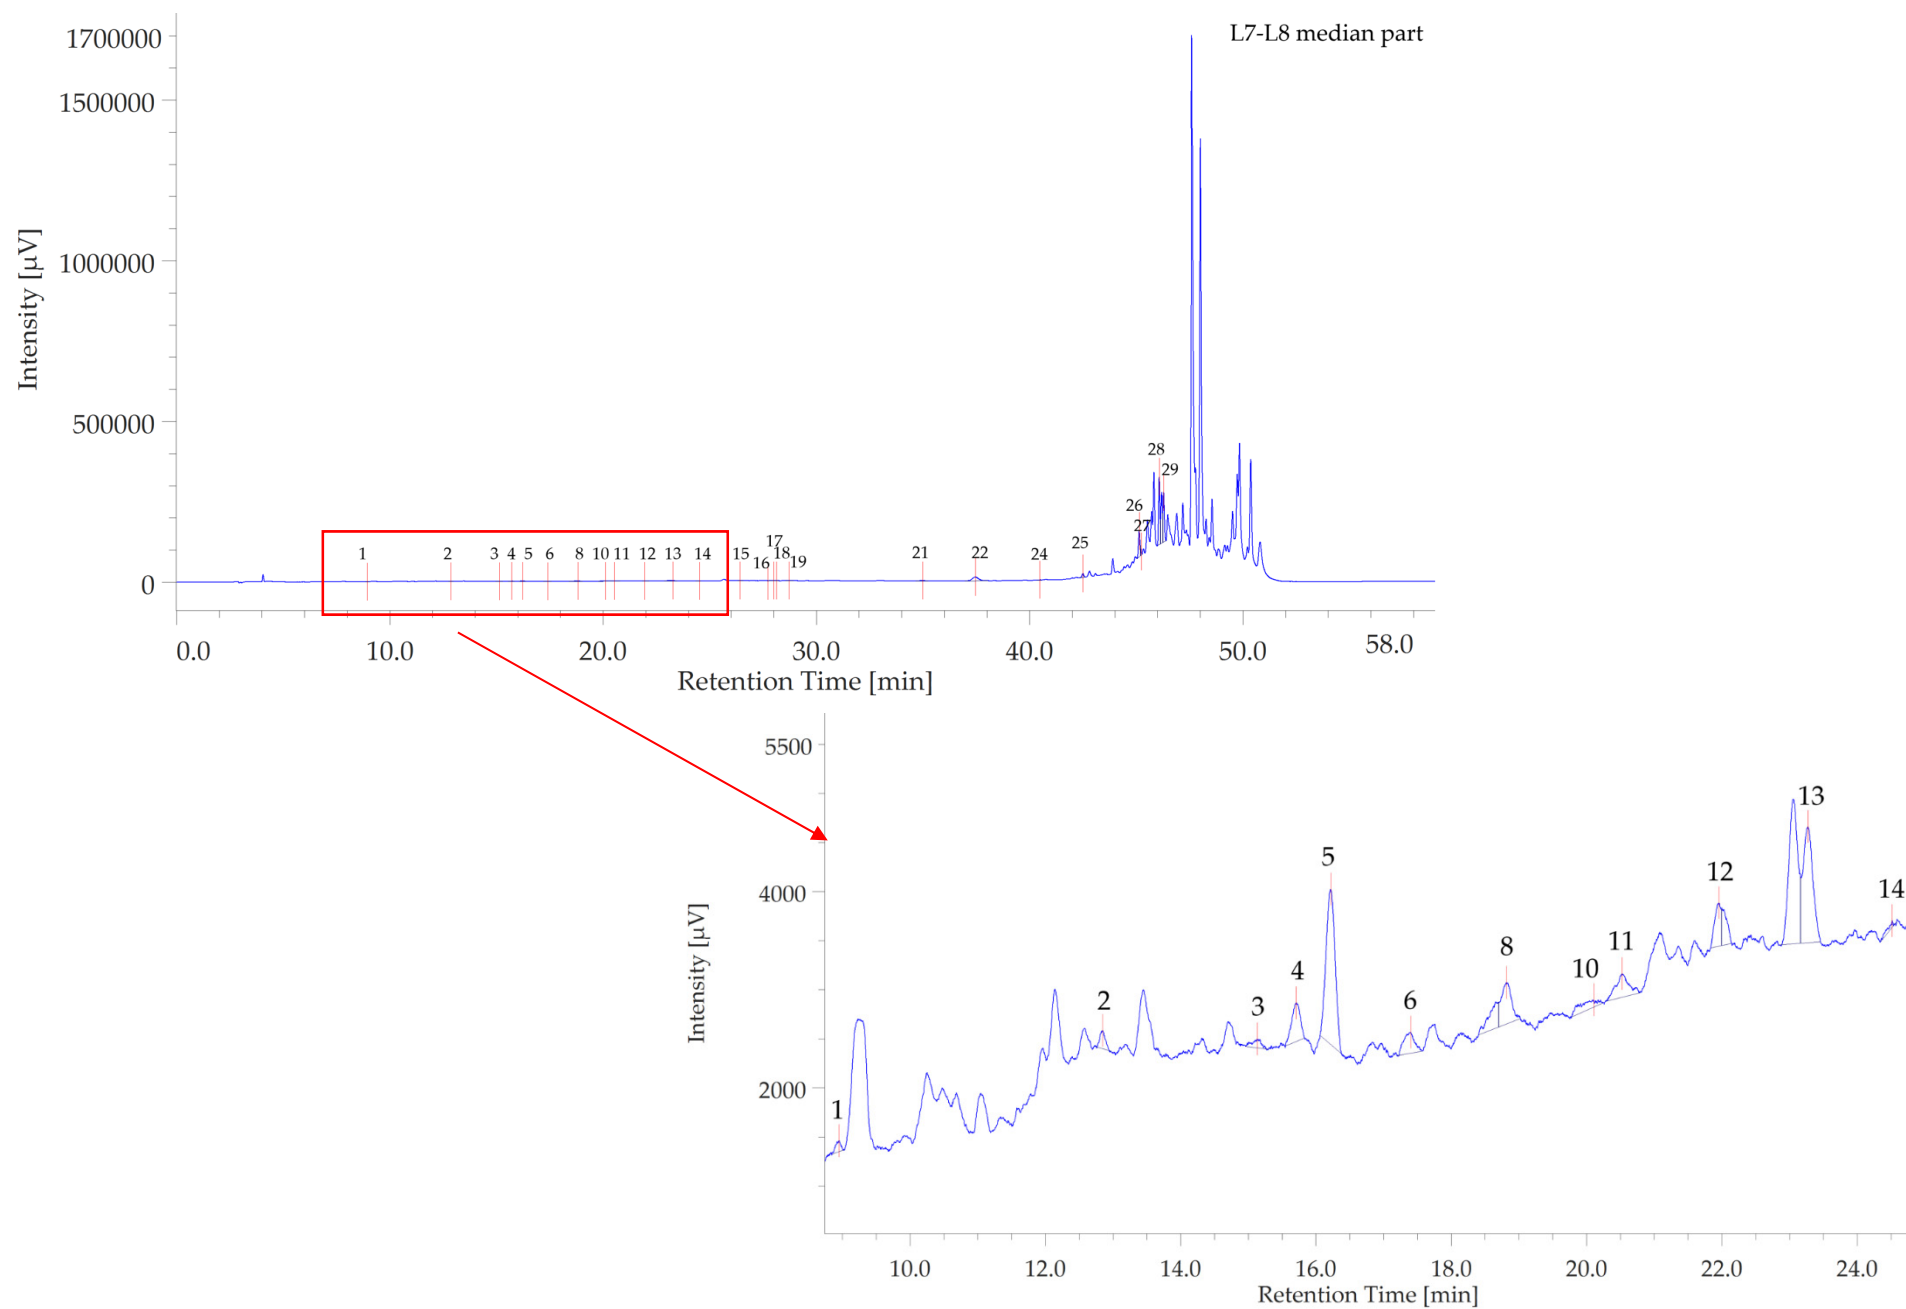

**Figure S3.** Chromatograms of hydroalcoholic extracts from the median part of *Fomitopsis officinalis*.

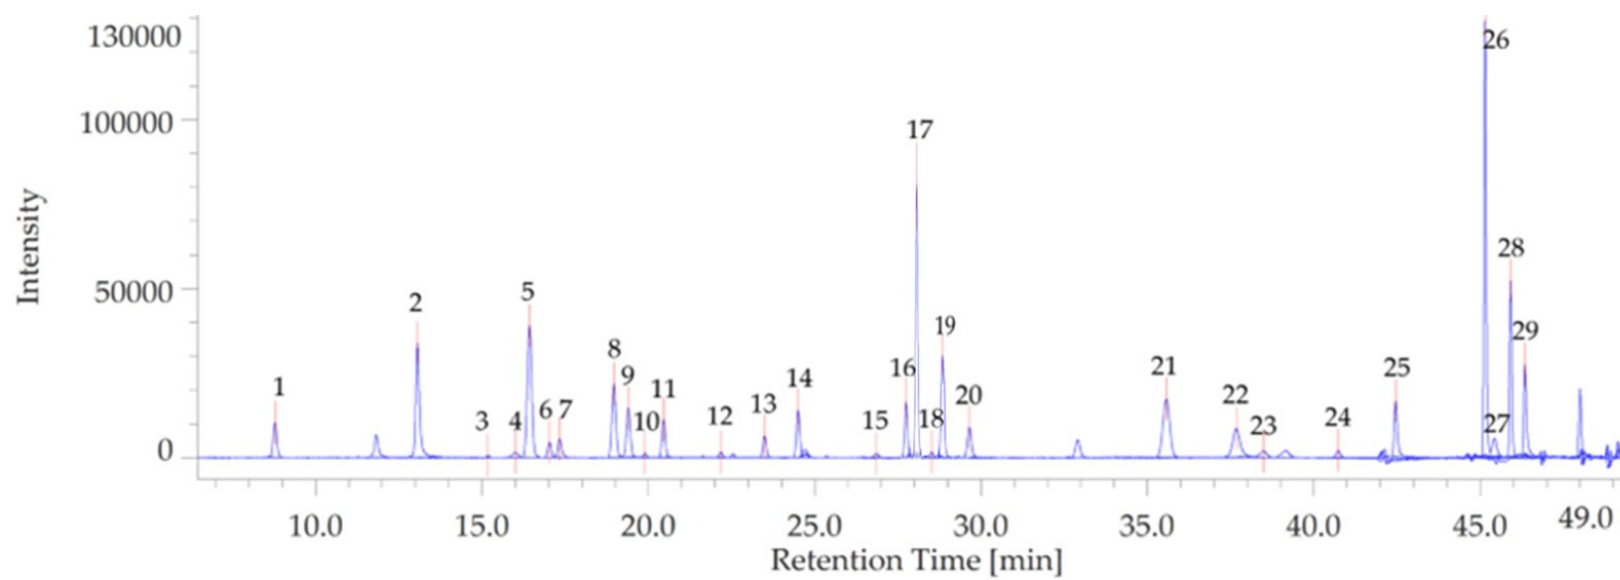

**Figure S4.** Chromatogram obtained from the standards.
